# Supplementary material
Source: Springer Nature journal article supplement (https://www.springermedizin.de/resource/supplementary/11689_2014_91_MOESM5_ESM.pdf/9673224)

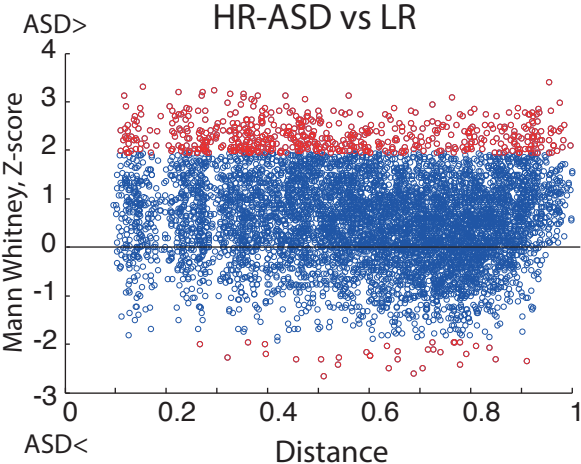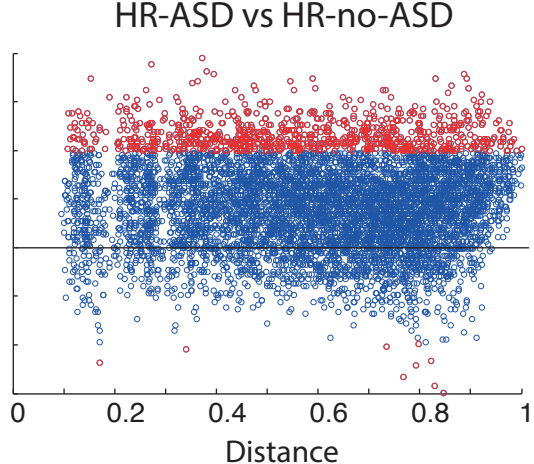

Supplement: MOESM5 [file 9673224]
